# Supplementary material
Source: PubMed Central journal article supplement (PMC4936966)
Supplement: NIHMS790590-supplement-04.pdf [file NIHMS790590-supplement-04.pdf]

## Second Breeding Season

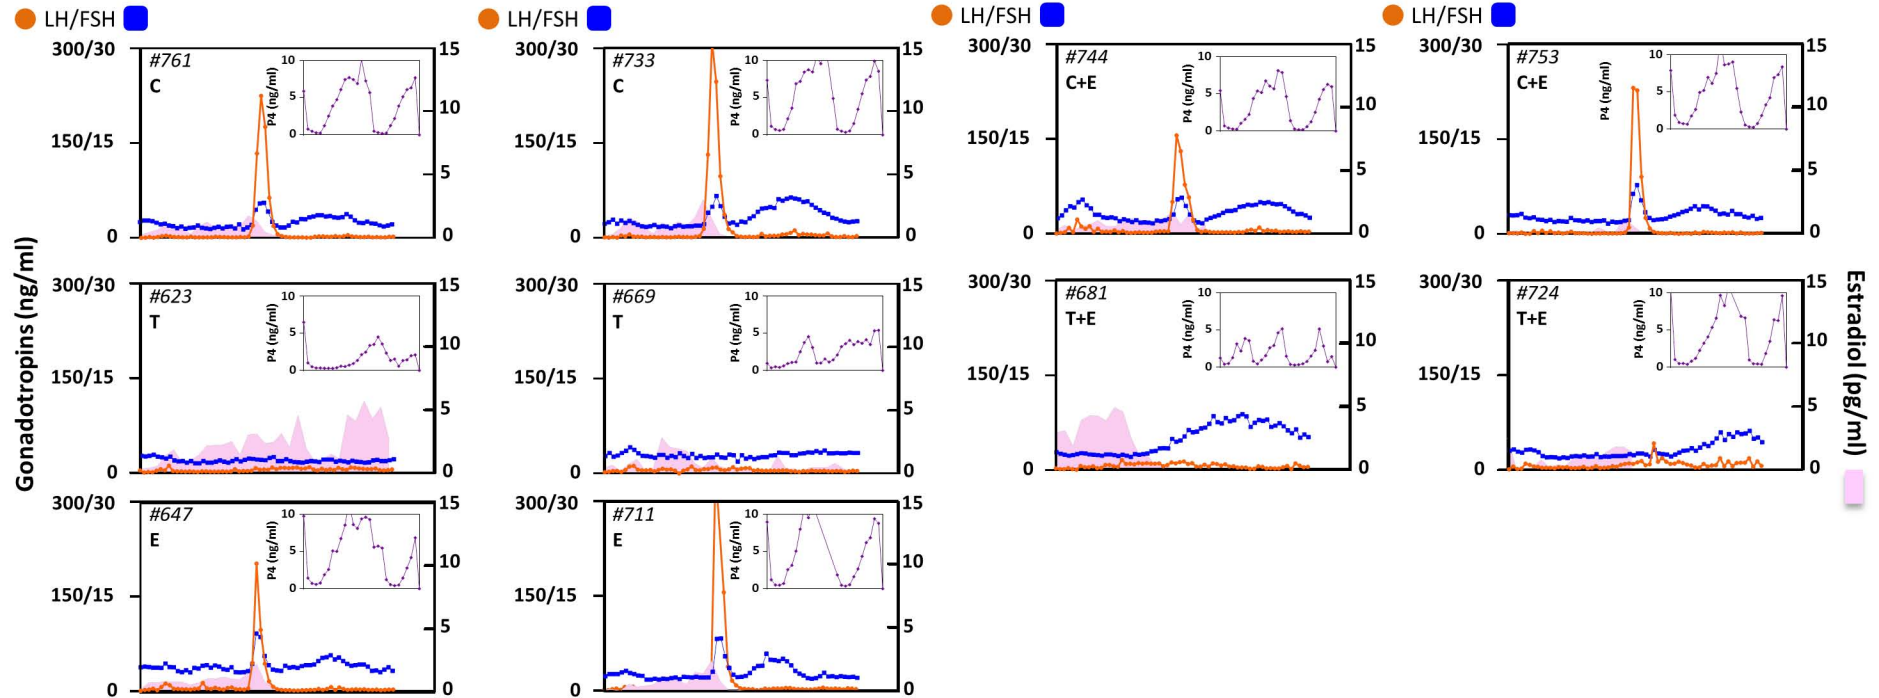

No animals from D, ED and D+E groups were available for the second breeding season
