# Supplementary material
Source: PubMed Central journal article supplement (PMC4936966)

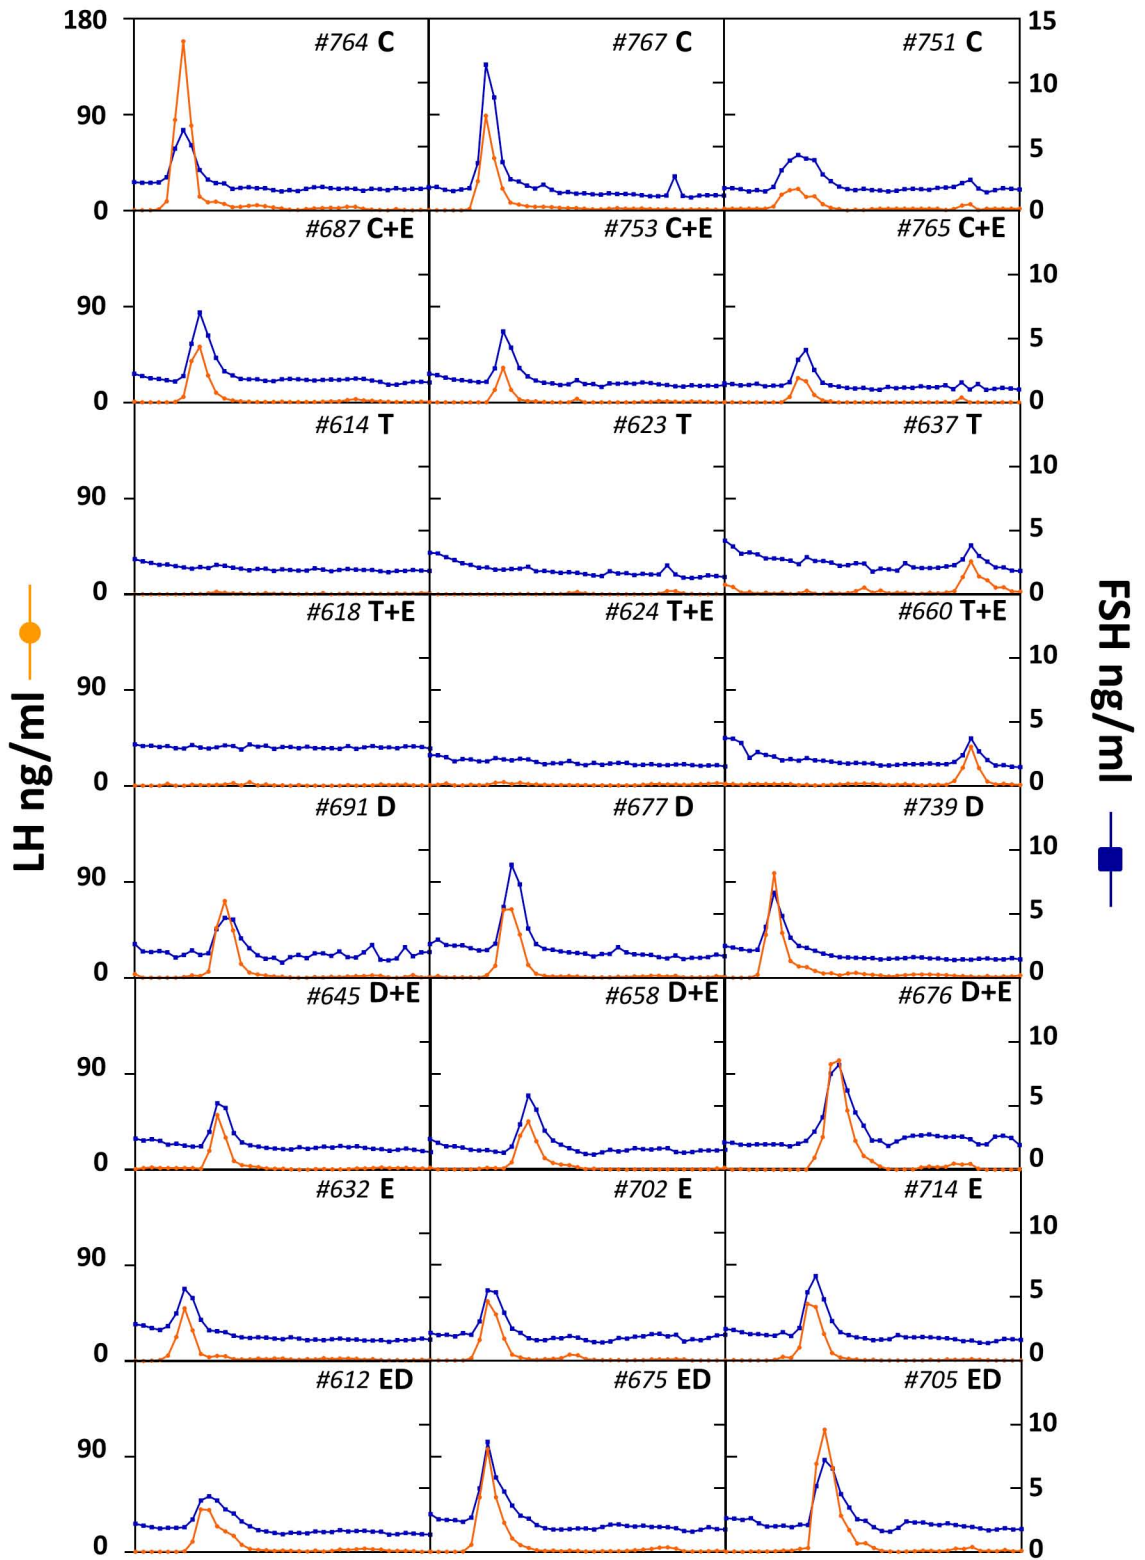

Supplemental Fig. 2

Supplement: NIHMS790590-supplement-02.pdf [file NIHMS790590-supplement-02.pdf]
